# Supplementary material for: Association of Brain Metastases With Survival in Patients With Limited or Stable Extracranial Disease: A Systematic Review and Meta-analysis
Source: PubMed Central journal article supplement (PMC9951042; doi:10.1001/jamanetworkopen.2023.0475), 2023-02-23
Supplement: jamanetwopen-e230475-s002.pdf [file jamanetwopen-e230475-s002.pdf]

## Data Sharing Statement

Li. Association of Brain Metastases With Survival in Patients With Limited or Stable Extracranial Disease. *JAMA Netw Open*. Published February 23, 2023.

doi:10.1001/jamanetworkopen.2023.0475

### Data

**Data available:** Yes

**Data types:** Deidentified participant data

**How to access data:** <https://www.dropbox.com/sh/ili4y7jlbxdus6q/AADfadR6rKH6k728-9yg688Za?dl=0>

**When available:** With publication

### Supporting Documents

**Document types:** Statistical/analytic code

**How to access**

**documents:** <https://www.dropbox.com/sh/ili4y7jlbxdus6q/AADfadR6rKH6k728-9yg688Za?dl=0>

**When available:** With publication

### Additional Information

**Who can access the data:** Any academic affiliate who wishes to use the dataset for meta-analyses or subgroup analyses

**Types of analyses:** Meta-analyses, subgroup analyses

**Mechanisms of data availability:** None
